# Supplementary material for: Rutin/Sulfobutylether-β-Cyclodextrin as a Promising Therapeutic Formulation for Ocular Infection
Source: MDPI journal article supplement (doi:10.3390/pharmaceutics16020233), 2024-02-05
Supplement: s1 [file s1]

# Rutin/sulfobutylether- $\beta$ -cyclodextrin as a promising therapeutic agent/formulation for ocular infection

Federica De Gaetano <sup>1</sup>, Martina Pastorello <sup>1</sup>, Venerando Pistarà <sup>2</sup>, Antonio Rescifina <sup>2</sup>, Fatima Margani <sup>3</sup>, Vincenzina Barbera <sup>3</sup>, Cinzia Anna Ventura <sup>1,\*</sup> and Andreana Marino <sup>1,\*</sup>

<sup>1</sup> Dipartimento di Scienze Chimiche, Biologiche, Farmaceutiche e Ambientali, Università di Messina, Viale Ferdinando Stagno d'Alcontres 31, 98166 Messina, Italy; [fedegaetano@unime.it](mailto:fedegaetano@unime.it) (F.D.G.); [martina.pastorello@studenti.unime.it](mailto:martina.pastorello@studenti.unime.it) (M.P.);

<sup>2</sup> Dipartimento di Scienze del Farmaco e della Salute, Università di Catania, Viale A. Doria 6, 95125 Catania, Italy; [vpistara@unict.it](mailto:vpistara@unict.it) (V.P.); [arescifina@unict.it](mailto:arescifina@unict.it) (A.R.);

<sup>3</sup> Dipartimento di Chimica, Materiali e Ingegneria Chimica "G. Natta", Politecnico di Milano, Via Mancinelli 7, 20131 Milano, Italy; [fatima.margani@polimi.it](mailto:fatima.margani@polimi.it) (F.M.); [vincenzina.barbera@polimi.it](mailto:vincenzina.barbera@polimi.it) (V.B.).

\* Correspondence: [caventura@unime.it](mailto:caventura@unime.it) (C.A.V.); [anmarino@unime.it](mailto:anmarino@unime.it) (A.M.)

## Initial deployment of RTN for MD simulations

To start the MD simulation with a plausible arrangement of host and guest molecules, we conducted a molecular docking experiment employing the AutoDock 4.2.6 software implemented in YASARA.

The maps were generated by the program AutoGrid (4.2.6) with a spacing of 0.375 Å and dimensions that encompass all atoms extending 10 Å from the surface of the AM1 minimized structure of the SBE- $\beta$ -CD. All the parameters were inserted at default settings. In the docking tab, the macromolecule and ligand are selected, and GA parameters are set as  $ga\_runs = 100$ ,  $ga\_pop\_size = 150$ ,  $ga\_num\_evals = 20000000$ ,  $ga\_num\_generations = 27000$ ,  $ga\_elitism = 1$ ,  $ga\_mutation\_rate = 0.02$ ,  $ga\_crossover\_rate = 0.8$ ,  $ga\_crossover\_mode = two\ points$ ,  $ga\_cauchy\_alpha = 0.0$ ,  $ga\_cauchy\_beta = 1.0$ , number of generations for picking worst individual = 10.

The results of docking indicate that between the best poses of RTN, there is one in which it is inserted in the SBE- $\beta$ -CD cavity from the upper rim with the ring X inside the cavity and the other one in which RTN is inserted in the SBE- $\beta$ -CD cavity from the upper rim with the ring Y inside the cavity.

## Free binding energy calculation

A well-known and widely used molecular mechanics/Poisson-Boltzmann surface area (MM/PBSA) approach was employed to estimate the binding free energy that can be achieved from the difference between the free energies of the RTN/SBE- $\beta$ -CD complex ( $\Delta G_{complex}$ ), free SBE- $\beta$ -CD ( $\Delta G_{CD}$ ) and RTN ( $\Delta G_{RTN}$ ) according to the following equation:

$$\Delta G_{bind} = \Delta G_{complex} - (\Delta G_{CD} + \Delta G_{RTN}) \quad \text{eq. (S1)}$$

The total free energy of each molecule typically contains the enthalpy ( $\Delta H$ ) and entropy ( $\Delta S$ ) contributions, as given in Equation (S2):

$$\Delta G = \Delta H - T\Delta S \quad \text{eq. (S2)}$$

where the  $\Delta H$  of any system is composed of the enthalpy changes in the gas phase upon complex formation ( $\Delta E_{MM}$ ) and the solvated free energy contribution ( $\Delta G_{solv}$ ), while the  $T\Delta S$  is the change of conformational entropy upon the complex formation.

Therefore, Equation (S2) can be re-written as:

$$\Delta G = \Delta E_{MM} + \Delta G_{sol} - T\Delta S \quad \text{eq. (S3)}$$

where  $\Delta E_{MM}$  is the summation of the bonded ( $\Delta G_{bonded}$ ) and nonbonded van der Waals ( $\Delta E_{vdW}$ ) and electrostatic ( $\Delta E_{ele}$ ) energies evaluated with YASARA software.

$$\Delta E_{MM} = \Delta E_{bonded} + \Delta E_{vdW} + \Delta E_{MM} \quad \text{eq. (S4)}$$

The solvation free energy ( $\Delta G_{solv}$ ) is divided into the polar ( $\Delta G_{psolv}$ ) and non-polar ( $\Delta G_{npsolv}$ ) terms as shown in Equation (S5).

$$\Delta G_{solv} = \Delta G_{psolv} + \Delta G_{npsolv} \quad \text{eq. (S5)}$$

The polar solvation free energy component was computed by the Poisson–Boltzmann (PB) equation, while the non-polar term was estimated from a linear relation according to Equation (6):

$$\Delta G_{npsolv} = \gamma \text{SASA} + \beta \quad \text{eq. (S6)}$$

where SASA is the solvent accessible surface area of each given molecule and is determined using a solvent probe radius of 1.4 Å. The values of the surface tension  $\gamma$  and the offset  $\beta$  were set to 0.00542 kcal/molÅ<sup>2</sup> and 0.92 kcal/mol, respectively. Dielectric constants of 1.0 and 80.0 were used for the solute and solvent, respectively. The entropy term ( $\Delta S$ ) consisting of translational, rotational and vibrational contributions was determined by normal mode analysis.
